# Supplementary material
Source: publisher site journal article supplement (https://www.spandidos-publications.com/7645/downloadSupplementary)

Figure S1. Hierarchical clustering results of the differential metabolites. Each line represents a metabolite. The deeper the red, the higher its content in the measured sample; the deeper the blue, the lower its content in the measured sample. CHD, congenital heart disease.

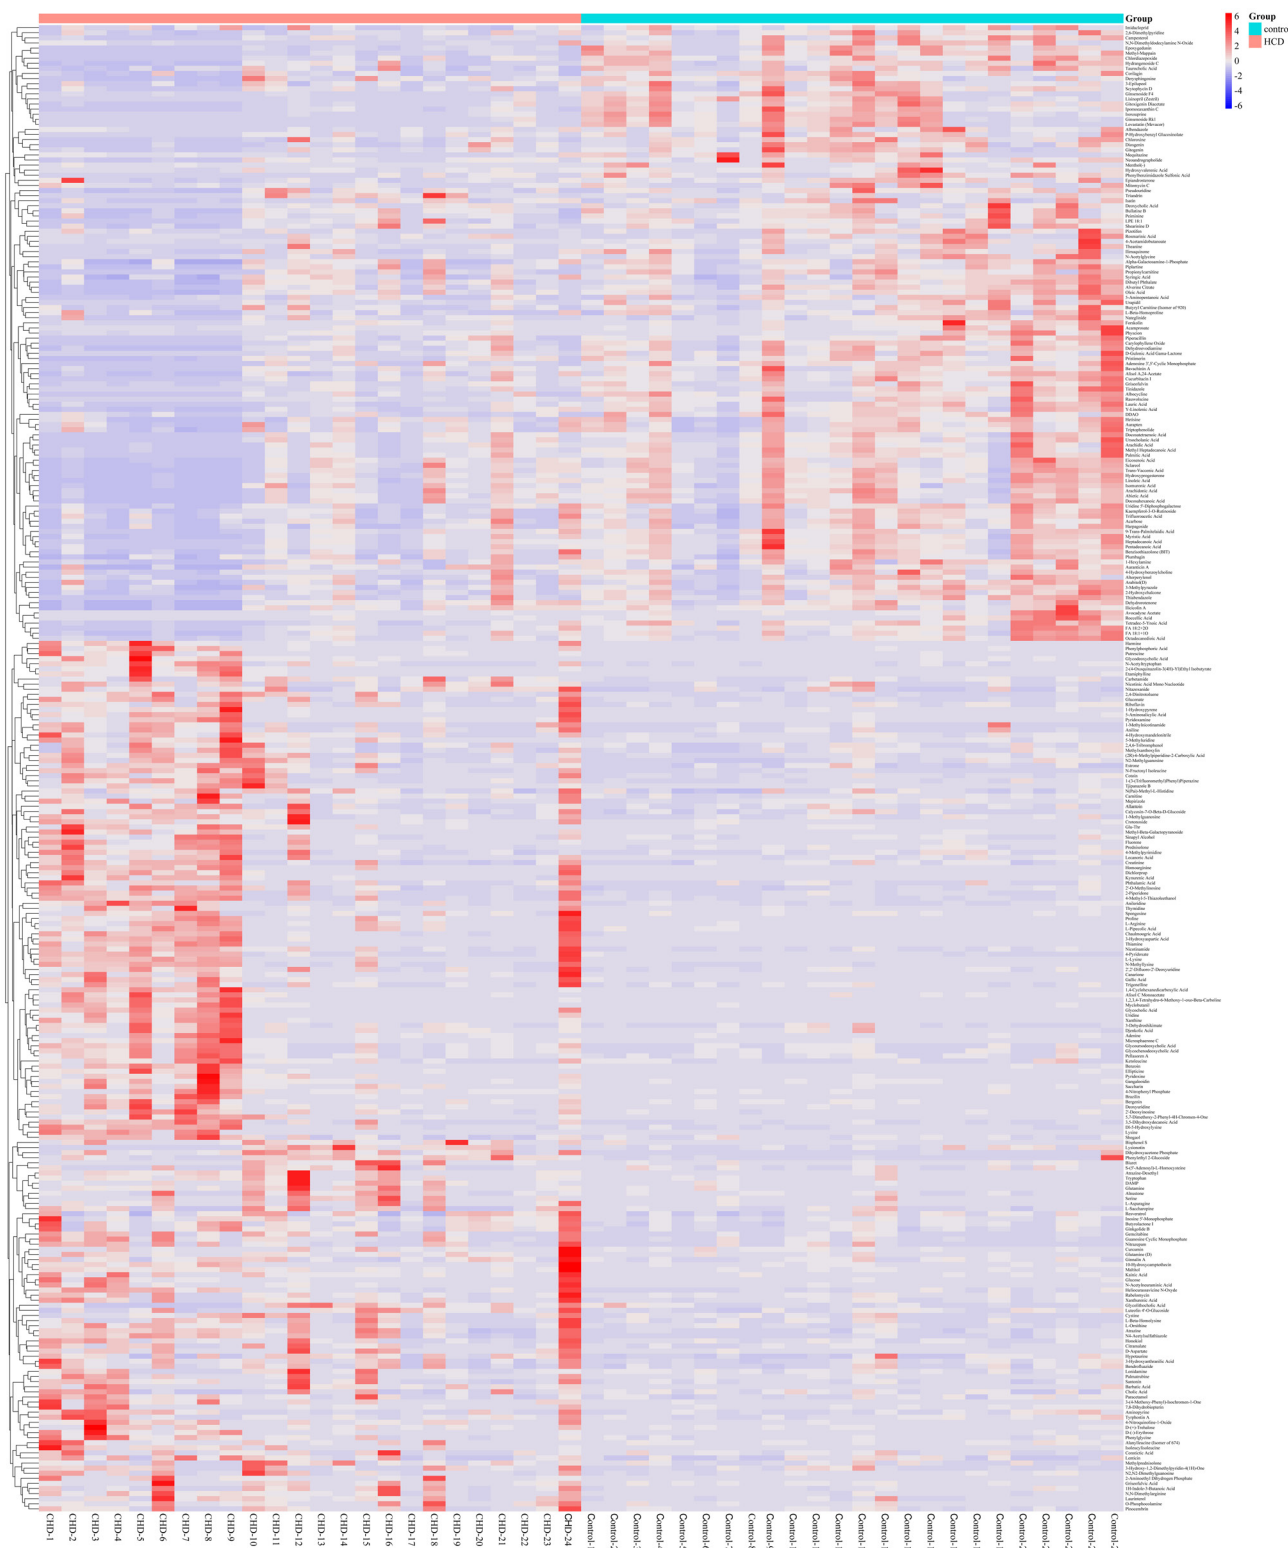

Supplement: Supplementary file 1 [file downloadSupplementary]
